# Supplementary material
Source: PubMed Central journal article supplement (PMC3773775)
Supplement: 1307391110_pnas.201307391SI.pdf [file 1307391110_pnas.201307391SI.pdf]

# Supporting Information

Chang et al. 10.1073/pnas.1307391110

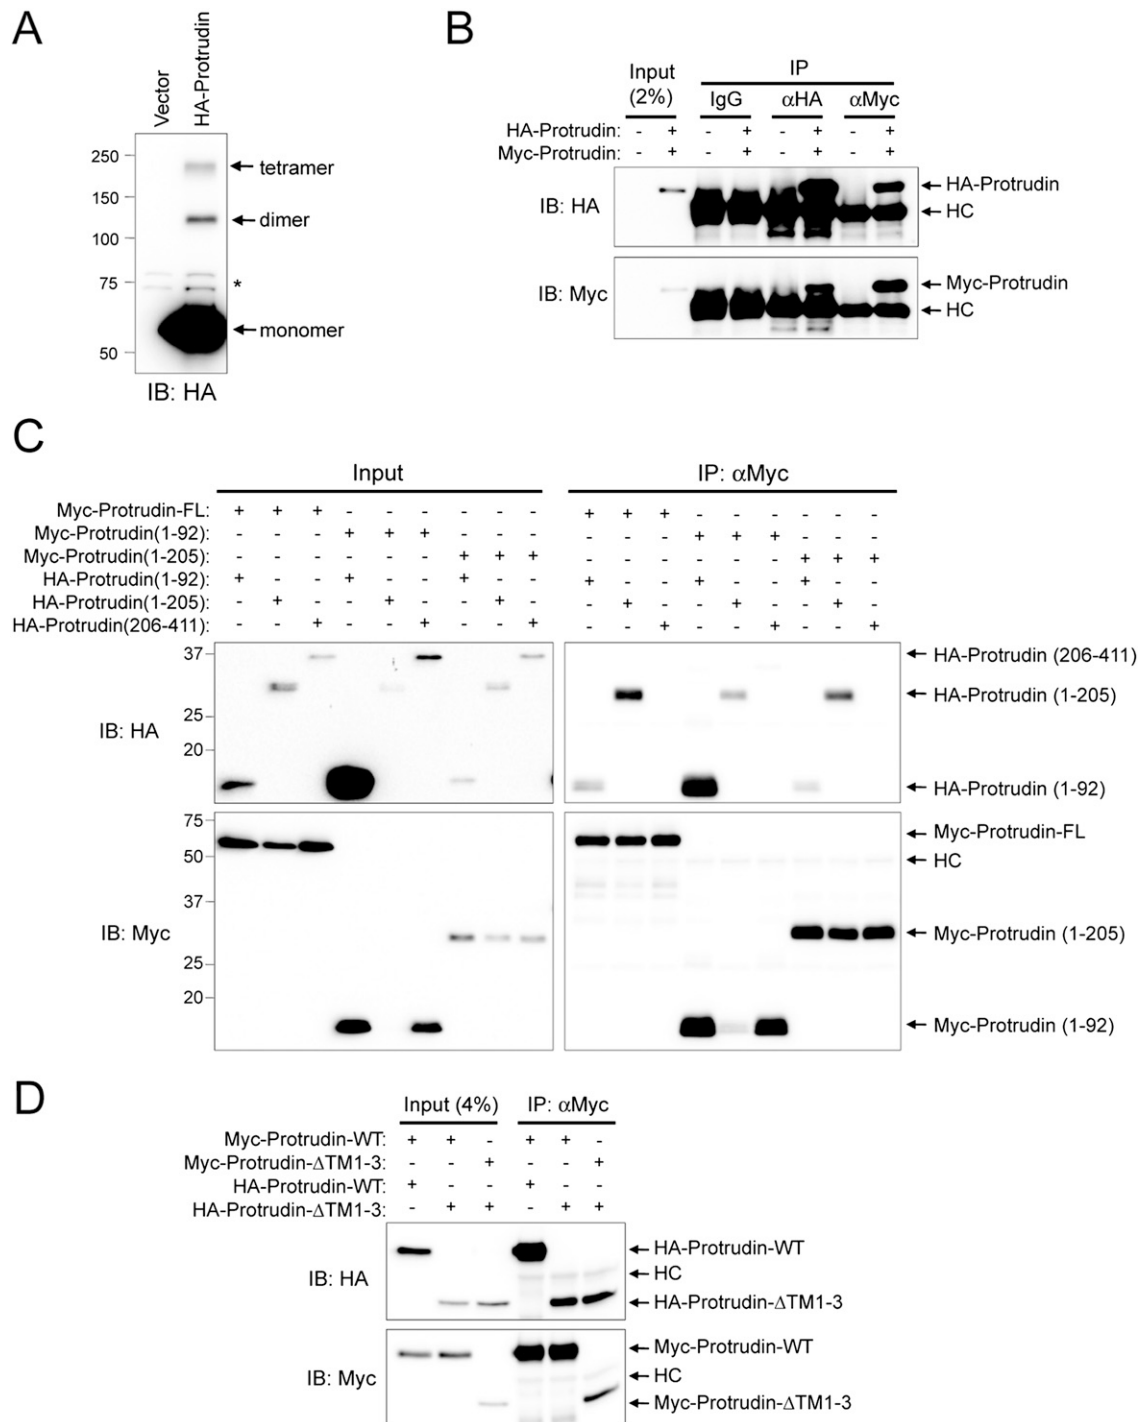

**Fig. S1.** Protrudin is an oligomeric protein. (A) HEK293T cells were transfected with vector and HA-protrudin constructs, and cell lysates were immunoblotted for HA-epitope. An asterisk (\*) identifies probable cross reacting bands. (B) HA- and Myc-tagged protrudin were coexpressed in HEK293T cells. Lysates were immunoprecipitated (IP) and immunoblotted (IB) with the indicated antibodies. (C) HA- and Myc-tagged full-length or truncated protrudin proteins were coexpressed in cells, and lysates were immunoprecipitated and immunoblotted. (D) HA- and Myc-tagged full-length or membrane domain (TM)-lacking protrudin proteins were coexpressed, and lysates were immunoprecipitated and immunoblotted as shown. HC, IgG heavy chain. Migrations of molecular-mass standards (in kilodaltons) are to the left in A and C.

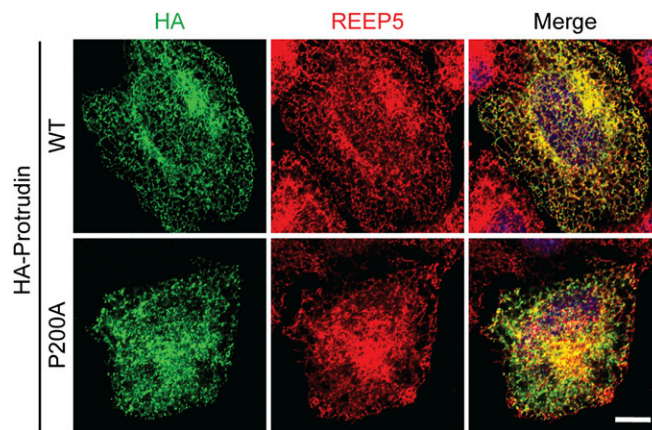

**Fig. S2.** Pro200 is important for the reticular endoplasmic reticulum (ER) localization of protrudin. HA-tagged wild-type (WT) and P200A mutant protrudin were expressed in HeLa cells and immunostained for HA (green) and REEP5 (red). Merged images are to the right. (Scale bar: 10  $\mu$ m.)

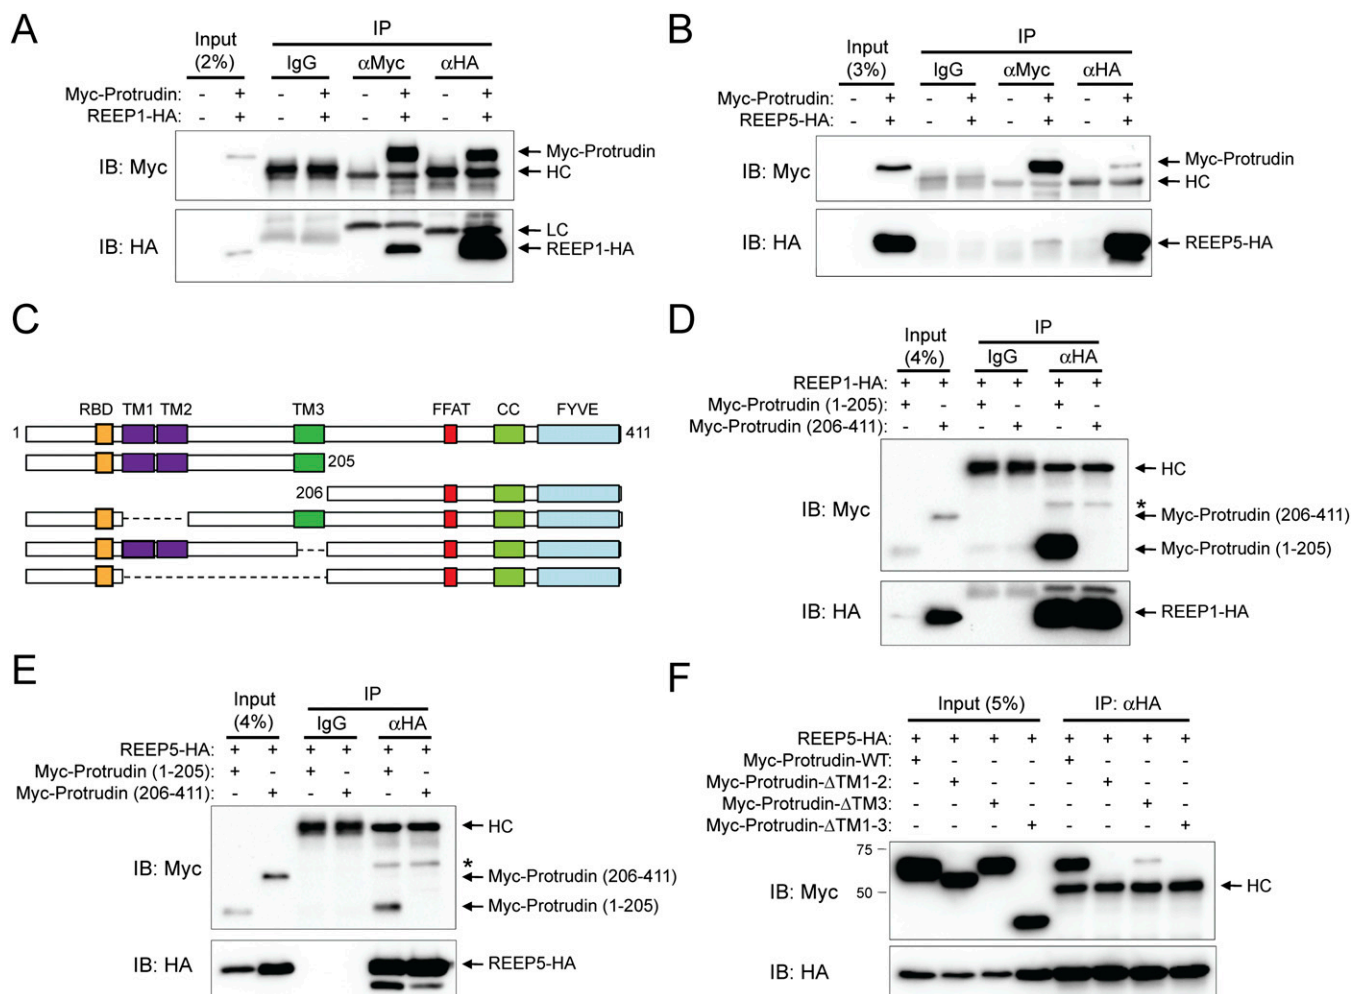

**Fig. S3.** Protrudin associates with ER-shaping receptor expression-enhancing proteins (REEPs). (A and B) Myc-tagged protrudin was coexpressed with REEP1-HA (A) or REEP5-HA (B) in HEK293T cells, and lysates were immunoprecipitated (IP) and immunoblotted (IB) with the indicated antibodies. (C–E) N terminus of protrudin containing all membrane domains (TM) or C terminus lacking the TM domains (C) were coexpressed with REEP1-HA (D) or REEP5-HA (E), and lysates were immunoprecipitated and immunoblotted as shown. (F) Wild-type (WT) protrudin or deletion mutants lacking the indicated TM domains (C) were coexpressed with REEP5-HA, and lysates were immunoprecipitated and immunoblotted. HC, IgG heavy chain; LC, IgG light chain. Asterisks (\*) denote cross-reacting bands.



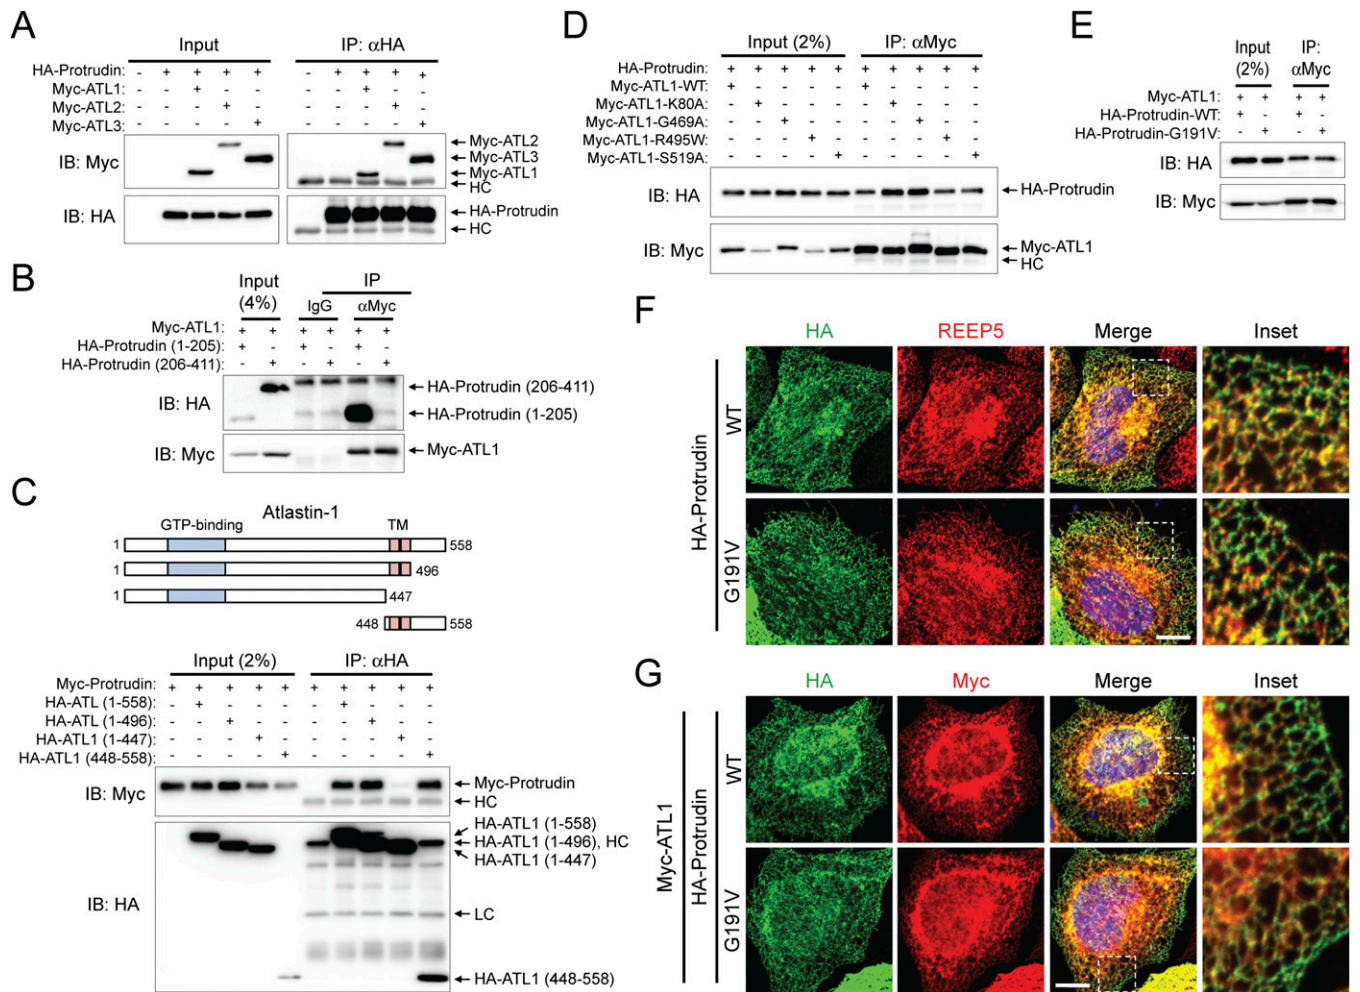

**Fig. S5.** Protrudin associates with atlastins. (A) HA-protrudin was coexpressed with Myc-tagged atlastin-1, atlastin-2, or atlastin-3 in HEK293T cells, and cell lysates were immunoprecipitated (IP) and immunoblotted (IB) with indicated antibodies. (B) Myc-atlastin-1 was coexpressed with either the N-terminal (1–205) or C-terminal (206–411) portion of protrudin, and lysates were immunoprecipitated and immunoblotted. (C and D) HA-protrudin was coexpressed with the indicated Myc-tagged truncation (C) or missense mutants (D) of atlastin-1, and lysates were immunoprecipitated and immunoblotted as shown. (E) Myc-atlastin-1 was coexpressed with HA-tagged wild-type (WT) or SPG33 mutant (G191V) protrudin, and lysates were immunoprecipitated and immunoblotted. (F) HeLa cells expressing HA-tagged wild-type or G191V mutant protrudin were immunostained for HA-epitope (green) and endogenous REEP5 (red). (G) Myc-atlastin-1 was coexpressed with HA-tagged wild-type or G191V mutant protrudin, and cells were immunostained for HA- (green) and Myc- (red) epitopes. *Insets* in the merged images (with DAPI staining of nuclei) in F and G are enlarged to the right. ATL, atlastin; HC, IgG heavy chain; LC, IgG light chain. (Scale bars: 10  $\mu$ m.)

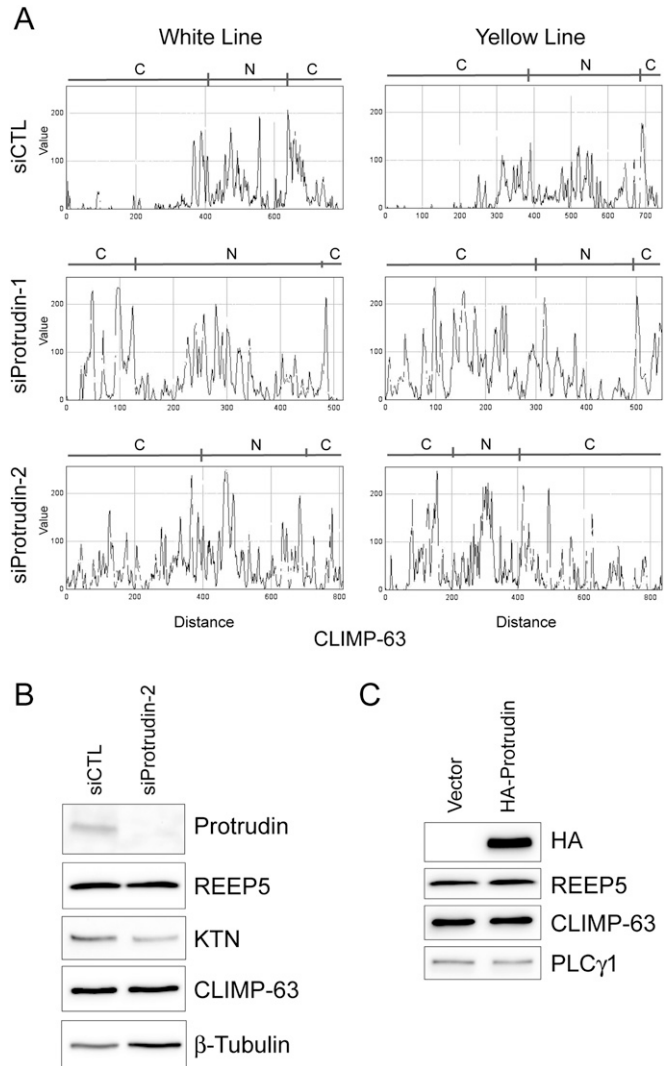

**Fig. S6.** Protrudin modulates the ER sheet-to-tubule balance without changing levels of ER sheet and tubule proteins. (A) Line-scan plots associated with Fig. 3B. Line-intensity measurement tools (ImageJ plug in) were used to measure the distributions CLIMP-63 signals in the representative images. C, cytoplasm; N, nucleus. (B) HeLa cells were transfected with control (siCTL) or protrudin-2 siRNAs for 72 h, and cell lysates (10  $\mu$ g protein per lane) were immunoblotted with the indicated antibodies. (C) HeLa cells were transfected with vector and HA-protrudin, and cell lysates were immunoblotted with the indicated antibodies (10  $\mu$ g protein per lane). KTN, kinectin.

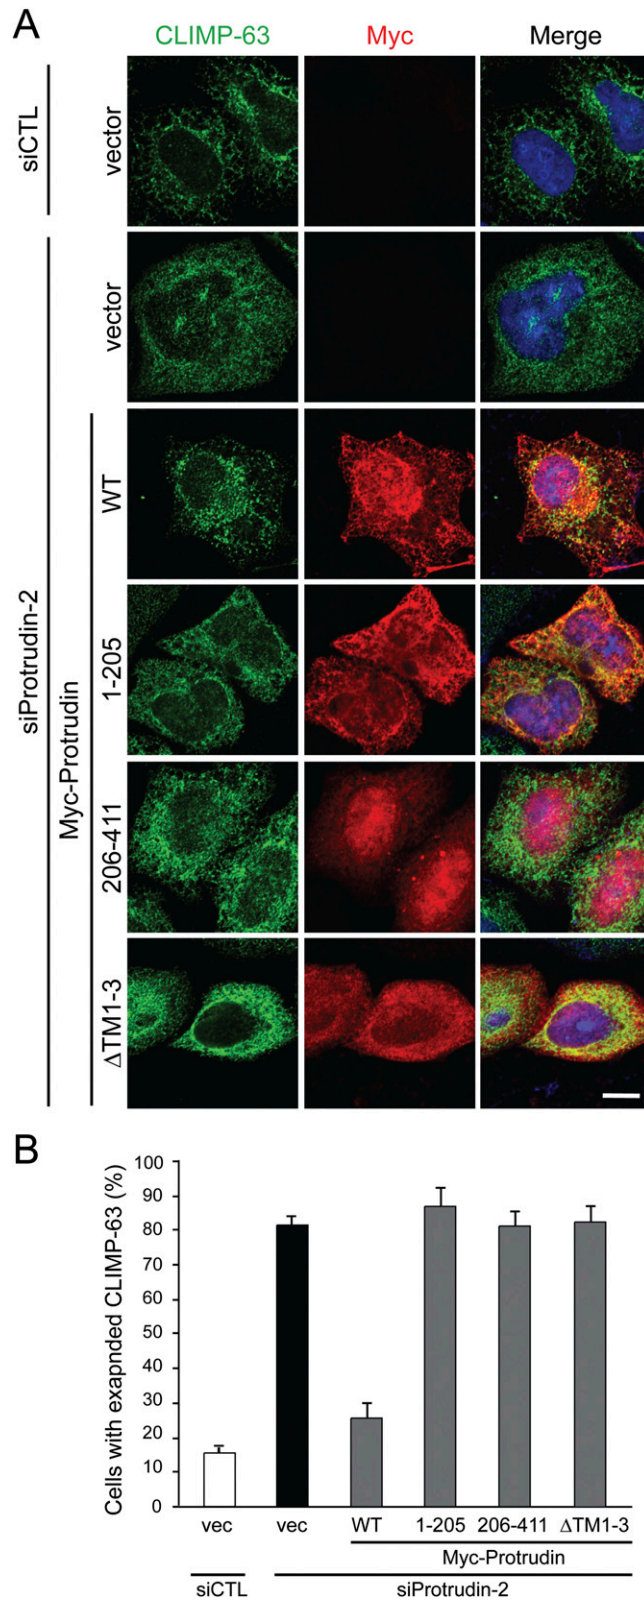

**Fig. 57.** Suppression of ER-morphology phenotype in protrudin-depleted cells requires multiple protrudin domains. HeLa cells were transfected with control (siCTL) or protrudin-specific siRNAs and subsequently with the indicated Myc-protrudin constructs. Cells were immunostained for CLIMP-63 (green) and Myc-epitope (red) (A), with merged images with DAPI nuclear staining to the right, and numbers of cells with expanded CLIMP-63 signals were quantified ( $n = 3$ ;  $>200$  cells/experiment) (B). Means  $\pm$  SD are shown. (Scale bar: 10  $\mu$ m.) WT, wild-type.
